# Supplementary material
Source: PubMed Central journal article supplement (PMC3578134)
Supplement: NIHMS422355-supplement-01.pdf [file NIHMS422355-supplement-01.pdf]

Table S1. Participant characteristics by quartiles of total urine arsenic

|                                             | N    | Total Urine Arsenic ( $\mu\text{g/g}$ creatinine) |                   |                   |                   | P-trend |
|---------------------------------------------|------|---------------------------------------------------|-------------------|-------------------|-------------------|---------|
|                                             |      | <7.8                                              | 7.8 – 12.8        | 12.8 – 20.5       | >20.5             |         |
| Number                                      | 3821 | 960                                               | 957               | 952               | 952               |         |
| Sex                                         |      |                                                   |                   |                   |                   |         |
| Male                                        | 1561 | 48.2                                              | 41.4              | 39.0              | 34.7              | <0.01   |
| Female                                      | 2260 | 51.8                                              | 58.6              | 61.0              | 65.2              |         |
| Age, years                                  | 3821 | 56.5 (8.2)                                        | 55.9 (8.0)        | 56.6 (8.0)        | 56.0 (7.9)        | 0.48    |
| Study Location                              |      |                                                   |                   |                   |                   |         |
| Arizona                                     | 1298 | 9.2                                               | 27.7              | 41.3              | 58.0              | <0.01   |
| Oklahoma                                    | 1267 | 65.0                                              | 35.8              | 19.8              | 11.7              |         |
| South Dakota                                | 1256 | 25.8                                              | 36.5              | 38.9              | 30.3              |         |
| Education, years                            |      |                                                   |                   |                   |                   |         |
| No HS                                       | 847  | 10.2                                              | 20.1              | 26.3              | 32.3              | <0.01   |
| Some HS                                     | 960  | 25.1                                              | 23.7              | 24.6              | 27.1              |         |
| Completed HS                                | 2014 | 64.7                                              | 56.2              | 49.1              | 40.6              |         |
| BMI, $\text{kg/m}^2$                        | 3821 | 30.9 (5.7)                                        | 31.4 (6.5)        | 30.9 (6.5)        | 30.4 (6.4)        | 0.01    |
| Smoking status                              |      |                                                   |                   |                   |                   |         |
| Never                                       | 1298 | 35.2                                              | 34.9              | 32.7              | 33.1              | 0.81    |
| Former                                      | 1246 | 31.3                                              | 29.7              | 33.9              | 35.6              |         |
| Current                                     | 1277 | 33.5                                              | 35.4              | 33.4              | 31.3              |         |
| Alcohol status                              |      |                                                   |                   |                   |                   |         |
| Never                                       | 1601 | 47.4                                              | 42.7              | 40.6              | 36.8              | <0.01   |
| Former                                      | 618  | 17.7                                              | 16.2              | 15.6              | 15.2              |         |
| Current                                     | 1602 | 34.9                                              | 41.1              | 43.8              | 48.0              |         |
| Diabetes                                    |      |                                                   |                   |                   |                   |         |
| No                                          | 1922 | 61.2                                              | 52.5              | 47.9              | 39.6              | <0.01   |
| Yes                                         | 1899 | 38.8                                              | 47.5              | 52.1              | 60.6              |         |
| Systolic BP, mmHg                           | 3821 | 126.8 (18.4)                                      | 127.1 (18.7)      | 127.2 (19.1)      | 128.7 (20.8)      | 0.03    |
| Hypertension Medication                     |      |                                                   |                   |                   |                   |         |
| No                                          | 2927 | 75.7                                              | 76.7              | 78.4              | 75.6              | 0.85    |
| Yes                                         | 894  | 24.3                                              | 23.3              | 21.6              | 23.4              |         |
| eGFR, $\text{ml/min/1.73m}^2$               | 3821 | 94.6 (17.8)                                       | 95.8 (18.4)       | 98.7 (16.6)       | 99.1 (21.0)       | <0.01   |
| Fibrinogen, $\text{mg/dl}$                  | 3821 | 293.4 (74.8)                                      | 296.7 (75.7)      | 306.8 (78.4)      | 315.9 (90.2)      | <0.01   |
| Urine cadmium, $\mu\text{g/g}$              | 3821 | 1.0 (1.7)                                         | 1.2 (2.6)         | 1.3 (1.4)         | 1.4 (1.8)         | <0.01   |
| Urine ACR, $\text{mg/g}$                    | 3821 | 136.8 (776.8)                                     | 237.3 (974.6)     | 290.8 (1075.2)    | 614.8 (2667.2)    | <0.01   |
| Albuminuria status                          |      |                                                   |                   |                   |                   |         |
| No                                          | 2674 | 81.5                                              | 73.7              | 70.0              | 54.7              | <0.01   |
| Yes                                         | 1147 | 18.5                                              | 26.3              | 30.0              | 45.3              |         |
| Median (IQR) concentration, $\mu\text{g/g}$ |      |                                                   |                   |                   |                   |         |
| Total arsenic                               | 3821 | 5.6 (4.5, 6.7)                                    | 10.1 (8.8, 11.4)  | 15.9 (14.3, 18.1) | 29.2 (23.8, 39.3) |         |
| Sum of inorganic and methylated             | 3821 | 4.3 (3.3, 5.4)                                    | 8.0 (6.8, 9.5)    | 13.0 (11.0, 15.2) | 21.8 (17.1, 29.0) |         |
| Arsenobetaine                               | 3821 | 0.50 (0.33, 0.77)                                 | 0.63 (0.38, 1.33) | 0.79 (0.46, 1.94) | 1.17 (0.56, 6.81) |         |

Data are % for categorical variables and mean (SD) for continuous variables
