# Supplementary material
Source: PubMed Central journal article supplement (PMC3578134)
Supplement: NIHMS422355-supplement-02.pdf [file NIHMS422355-supplement-02.pdf]

Table S2. Ratio of geometric mean (95% CI) of albuminuria concentrations by urine arsenic concentrations

|                                                       | Total Arsenic, µg/g |                   |                   |                   | P-trend | 75 <sup>th</sup> vs 25 <sup>th</sup> percentile |
|-------------------------------------------------------|---------------------|-------------------|-------------------|-------------------|---------|-------------------------------------------------|
|                                                       | <7.8                | 7.8 – 12.8        | 12.8 – 20.5       | >20.5             |         |                                                 |
| N                                                     | 960                 | 957               | 952               | 942               |         | 3821                                            |
| Model 1                                               | 1.00 (Reference)    | 1.46 (1.21,1.76)  | 1.79 (1.48, 2.16) | 3.68 (3.04, 4.44) | <0.001  | 1.54 (1.45, 1.65)                               |
| Model 2                                               | 1.00 (Reference)    | 1.19 (0.99, 1.43) | 1.20 (0.99, 1.46) | 1.98 (1.61, 2.42) | <0.001  | 1.26 (1.17, 1.35)                               |
| Model 3                                               | 1.00 (Reference)    | 1.11 (0.95, 1.29) | 1.18 (1.01, 1.39) | 1.72 (1.45, 2.04) | <0.001  | 1.22 (1.15, 1.29)                               |
| Model 4                                               | 1.00 (Reference)    | 1.07 (0.92, 1.25) | 1.11 (0.95, 1.31) | 1.58 (1.33, 1.88) | <0.001  | 1.18 (1.11, 1.25)                               |
| Sum of inorganic and methylated arsenic species, µg/g |                     |                   |                   |                   |         |                                                 |
|                                                       | <5.8                | 5.8 – 9.7         | 9.7 – 15.6        | ≥15.6             | P-trend | 75 <sup>th</sup> vs 25 <sup>th</sup> percentile |
| N                                                     | 960                 | 963               | 945               | 953               |         | 3821                                            |
| Model 1                                               | 1.00 (Reference)    | 1.40 (1.16, 1.69) | 1.91 (1.58, 2.30) | 3.85 (3.19, 4.64) | <0.001  | 1.59 (1.49, 1.70)                               |
| Model 2                                               | 1.00 (Reference)    | 1.19 (0.99, 1.43) | 1.29 (1.06, 1.58) | 2.07 (1.67, 2.56) | <0.001  | 1.31 (1.21, 1.41)                               |
| Model 3                                               | 1.00 (Reference)    | 1.17 (1.00, 1.37) | 1.24 (1.05, 1.46) | 1.81 (1.51, 2.17) | <0.001  | 1.26 (1.18, 1.34)                               |
| Model 4                                               | 1.00 (Reference)    | 1.14 (0.98, 1.33) | 1.17 (0.99, 1.38) | 1.67 (1.39, 2.00) | <0.001  | 1.21 (1.14, 1.29)                               |

Model 1 is crude.

Model 2 is adjusted for age (continuous), sex, study region, body mass index (continuous), education, smoking status, and alcohol status.

Model 3 further includes diabetes status, hypertensive medication, and systolic blood pressure (continuous), eGFR (continuous).

Model 4 further includes urine cadmium (log-transformed).

\*p-value for trend was estimated by replacing participants in each quartile with the median value of each quartile
