# Supplementary material
Source: PubMed Central journal article supplement (PMC3578134)
Supplement: NIHMS422355-supplement-03.pdf [file NIHMS422355-supplement-03.pdf]

Table S3: Prevalence ratios for albuminuria  $\geq 30$  mg/g creatinine comparing a 75<sup>th</sup> vs 25<sup>th</sup> percentile change in urine arsenic concentrations ( $\mu\text{g/g}$  creatinine) by participant characteristics (N=3821).

|                                    | N    | PR   | Total Arsenic |                          | Sum of inorganic and methylated |              |                          |
|------------------------------------|------|------|---------------|--------------------------|---------------------------------|--------------|--------------------------|
|                                    |      |      | 95% CI        | P <sub>interaction</sub> | PR                              | 95% CI       | P <sub>interaction</sub> |
| Overall                            | 3821 | 1.22 | (1.12, 1.31)  |                          | 1.26                            | (1.16, 1.36) |                          |
| Sex                                |      |      |               |                          |                                 |              |                          |
| Male                               | 1561 | 1.19 | (1.05, 1.35)  | 0.282                    | 1.27                            | (1.11, 1.45) | 0.395                    |
| Female                             | 2260 | 1.23 | (1.11, 1.35)  |                          | 1.26                            | (1.13, 1.39) |                          |
| Age, years                         |      |      |               |                          |                                 |              |                          |
| <55 years                          | 1894 | 1.27 | (1.12, 1.43)  | 0.091                    | 1.37                            | (1.20, 1.56) | 0.021                    |
| 55 – 64 years                      | 1251 | 1.19 | (1.04, 1.35)  |                          | 1.17                            | (1.02, 1.33) |                          |
| >65 years                          | 676  | 1.13 | (0.96, 1.32)  |                          | 1.17                            | (0.98, 1.38) |                          |
| Study Region                       |      |      |               |                          |                                 |              |                          |
| Oklahoma                           | 1267 | 1.16 | (0.98, 1.36)  | 0.407                    | 1.23                            | (1.04, 1.45) | 0.568                    |
| Arizona                            | 1298 | 1.16 | (1.07, 1.26)  |                          | 1.17                            | (1.07, 1.27) |                          |
| Dakotas                            | 1256 | 1.23 | (1.03, 1.46)  |                          | 1.23                            | (1.03, 1.46) |                          |
| Education, years                   |      |      |               |                          |                                 |              |                          |
| No HS                              | 847  | 1.07 | (0.94, 1.20)  | 0.031                    | 1.08                            | (0.95, 1.22) | 0.016                    |
| Some HS                            | 960  | 1.18 | (1.02, 1.34)  |                          | 1.15                            | (0.99, 1.32) |                          |
| Completed HS                       | 2014 | 1.36 | (1.19, 1.54)  |                          | 1.49                            | (1.29, 1.71) |                          |
| BMI, kg/m <sup>2</sup>             |      |      |               |                          |                                 |              |                          |
| <25                                | 588  | 1.21 | (0.99, 1.47)  | 0.436                    | 1.29                            | (1.03, 1.59) | 0.146                    |
| 25 - 29                            | 1287 | 1.23 | (1.07, 1.39)  |                          | 1.30                            | (1.13, 1.49) |                          |
| >29                                | 1946 | 1.25 | (1.12, 1.39)  |                          | 1.26                            | (1.12, 1.41) |                          |
| Smoking Status                     |      |      |               |                          |                                 |              |                          |
| Never                              | 1298 | 1.18 | (1.04, 1.33)  | 0.851                    | 1.19                            | (1.04, 1.34) | 0.467                    |
| Former                             | 1246 | 1.20 | (1.05, 1.37)  |                          | 1.22                            | (1.06, 1.40) |                          |
| Current                            | 1277 | 1.28 | (1.09, 1.50)  |                          | 1.41                            | (1.19, 1.66) |                          |
| Alcohol Status                     |      |      |               |                          |                                 |              |                          |
| Never                              | 1601 | 1.18 | (1.05, 1.32)  | 0.296                    | 1.24                            | (1.09, 1.39) | 0.317                    |
| Former                             | 618  | 1.16 | (0.96, 1.39)  |                          | 1.14                            | (0.93, 1.38) |                          |
| Current                            | 1602 | 1.28 | (1.12, 1.45)  |                          | 1.35                            | (1.17, 1.54) |                          |
| Diabetes                           |      |      |               |                          |                                 |              |                          |
| No                                 | 1922 | 1.26 | (1.01, 1.57)  | 0.349                    | 1.35                            | (1.07, 1.69) | 0.581                    |
| Yes                                | 1899 | 1.20 | (1.10, 1.29)  |                          | 1.23                            | (1.13, 1.33) |                          |
| Systolic BP, mmHg                  |      |      |               |                          |                                 |              |                          |
| <120                               | 1421 | 1.22 | (1.01, 1.47)  | 0.591                    | 1.20                            | (0.99, 1.45) | 0.579                    |
| 120 – 139                          | 1536 | 1.22 | (1.06, 1.38)  |                          | 1.29                            | (1.12, 1.48) |                          |
| $\geq 140$                         | 864  | 1.19 | (1.06, 1.31)  |                          | 1.23                            | (1.09, 1.37) |                          |
| Hypertension medication            |      |      |               |                          |                                 |              |                          |
| No                                 | 2927 | 1.23 | (1.11, 1.36)  | 0.534                    | 1.30                            | (1.16, 1.44) | 0.308                    |
| Yes                                | 894  | 1.19 | (1.05, 1.33)  |                          | 1.19                            | (1.05, 1.34) |                          |
| eGFR, mL/minute/1.73m <sup>2</sup> |      |      |               |                          |                                 |              |                          |
| $\leq 60$                          | 171  | 1.24 | (1.13, 1.35)  | 0.041                    | 1.30                            | (1.18, 1.42) | 0.021                    |
| >60                                | 3650 | 0.98 | (0.89, 1.07)  |                          | 0.96                            | (0.87, 1.05) |                          |
| Urine cadmium ( $\mu\text{g/g}$ )  |      |      |               |                          |                                 |              |                          |
| <0.7                               | 1287 | 1.24 | (1.07, 1.42)  | 0.857                    | 1.30                            | (1.11, 1.50) | 0.306                    |
| 0.7 – 1.21                         | 1262 | 1.23 | (1.07, 1.40)  |                          | 1.26                            | (1.09, 1.45) |                          |
| $\geq 1.22$                        | 1271 | 1.21 | (1.06, 1.36)  |                          | 1.26                            | (1.10, 1.43) |                          |
| Fibrinogen (mg/dl)                 |      |      |               |                          |                                 |              |                          |
| <264                               | 1305 | 1.21 | (0.98, 1.47)  | 0.06                     | 1.36                            | (1.09, 1.68) | 0.583                    |
| 264 - 324                          | 1287 | 1.20 | (1.02, 1.40)  |                          | 1.30                            | (1.10, 1.52) |                          |
| >324                               | 1229 | 1.21 | (1.10, 1.32)  |                          | 1.18                            | (1.07, 1.29) |                          |

eGFR: estimated glomerular filtration rate.

Prevalence ratios were adjusted for age in years, sex, study location, body mass index ( $\text{kg}/\text{m}^2$ ), education in years, smoking status, alcohol status, systolic blood pressure, hypertension medication (yes or no), diabetes status (yes or no), eGFR category ( $\leq 60$   $\text{mL}/\text{minute}/1.73\text{m}^2$ ) urine cadmium (log-transformed), and fibrinogen (mg/dl).

<sup>b</sup> estimated using an interaction term between  $\log_2$ -transformed urine arsenic and the corresponding group of categories and using the Wald test.
